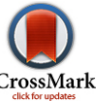

## Correction

# Correction: Childhood Adversity, Recent Life Stressors and Suicidal Behavior in Chinese College Students

## The PLOS ONE Staff

The second author's name is spelled incorrectly. The correct name is: Mingxi Cheng. The correct citation is: You Z, Cheng M, Yang S, Zhou Z, Qin P (2014) Childhood Adversity, Recent Life Stressors and Suicidal Behavior in Chinese College Students. PLoS ONE 9(3): e86672. doi:10.1371/journal.pone.0086672

## Reference

1. You Z, Chen M, Yang S, Zhou Z, Qin P (2014) Childhood Adversity, Recent Life Stressors and Suicidal Behavior in Chinese College Students. PLoS ONE 9(3): e86672. doi:10.1371/journal.pone.0086672

---

**Citation:** The PLOS ONE Staff (2014) Correction: Childhood Adversity, Recent Life Stressors and Suicidal Behavior in Chinese College Students. PLoS ONE 9(6): e101612. doi:10.1371/journal.pone.0101612

**Published:** June 27, 2014

**Copyright:** © 2014 The PLOS ONE Staff. This is an open-access article distributed under the terms of the Creative Commons Attribution License, which permits unrestricted use, distribution, and reproduction in any medium, provided the original author and source are credited.
